# Supplementary material for: SUSPECT: MINLP special structure detector for Pyomo
Source: Springer Nature journal article supplement (doi:10.1007/s11590-019-01396-y), 2019-02-16
Supplement: 11590_2019_1396_MOESM1_ESM.pdf [file 11590_2019_1396_MOESM1_ESM.pdf]

# SUSPECT: MINLP Special Structure Detector for Pyomo

## Supplementary Material

Francesco Ceccon • John D. Sirola • Ruth Misener

### A Rules of Interval Arithmetic

Given the intervals  $[x_1^L, x_1^U]$  and  $[x_2^L, x_2^U]$ , the following rules apply for finite bounds:

1.  $[x_1^L, x_1^U] + [x_2^L, x_2^U] = [x_1^L + x_2^L, x_1^U + x_2^U]$
2.  $[x_1^L, x_1^U] - [x_2^L, x_2^U] = [x_1^L - x_2^U, x_1^U - x_2^L]$
3.  $[x_1^L, x_1^U] \times [x_2^L, x_2^U] = [\min(x_1^L x_2^L, x_1^L x_2^U, x_1^U x_2^L, x_1^U x_2^U), \max(x_1^L x_2^L, x_1^L x_2^U, x_1^U x_2^L, x_1^U x_2^U)]$
4.  $[x_1^L, x_1^U] \div [x_2^L, x_2^U] = [x_1^L, x_1^U] \times [(x_2^U)^{-1}, (x_2^L)^{-1}]$  if  $0 \notin [x_2^L, x_2^U]$ ,  $[-\infty, \infty]$  otherwise

Tables 2–5 list the more complex arithmetic rules that SUSPECT uses when a bound is not finite [33].

### B Bound Tightening of Summation Expressions

Consider expression  $g(\mathbf{x})$  with range  $[g^L, g^U]$  that sums functions  $h_i(\mathbf{x})$ ,  $i = 1, \dots, N$  with range  $[h_i^L, h_i^U]$ .

$$g(\mathbf{x}) = h_1(\mathbf{x}) + h_2(\mathbf{x}) + \dots + h_N(\mathbf{x}) = \sum_{i=1}^N h_i(\mathbf{x}) = \sum_{i=1, i \neq j}^N h_i(\mathbf{x}) + h_j(\mathbf{x}).$$

It follows that, for all  $h_i(\mathbf{x})$  appearing in the summation  $g(\mathbf{x})$ , the bounds of  $h_j(\mathbf{x})$  are:

$$g^L - \sum_{i=1, i \neq j}^N h_i^U \leq h_j(\mathbf{x}) \leq g^U - \sum_{i=1, i \neq j}^N h_i^L.$$

Proceeding similarly for linear expressions:

$$g(\mathbf{x}) = \sum_{i=1}^N \alpha_i x_i,$$

the new bounds of  $x_j$  are:

$$g^L - \sum_{i=1, i \neq j, \alpha_i > 0}^N \alpha_i x_i^U - \sum_{i=1, i \neq j, \alpha_i < 0}^N \alpha_i x_i^L \leq \alpha_j x_j \leq g^U - \sum_{i=1, i \neq j, \alpha_i > 0}^N \alpha_i x_i^L - \sum_{i=1, i \neq j, \alpha_i < 0}^N \alpha_i x_i^U$$

### C Special Structure Detection

This section completes the monotonicity and convexity rules discussed in Section 4. Let  $k$  be the function defined as the composition  $k = g \circ h: X \rightarrow Y$  of the functions  $g: Z \rightarrow Y$  and  $h: X \rightarrow Z$ , where  $X \subseteq \mathbb{R}^n$ ,  $Y \subseteq \mathbb{R}$ ,  $Z \subseteq \mathbb{R}^l$ , and  $\text{dom } k = \{\mathbf{x} \in \text{dom } h \mid h(\mathbf{x}) \in \text{dom } g\}$ . The function image  $h$  is positive if  $h(\mathbf{x}) > 0$ ,  $\forall \mathbf{x} \in X$ , nonnegative if  $h(\mathbf{x}) \geq 0$ ,  $\forall \mathbf{x} \in X$ , negative if  $h(\mathbf{x}) < 0$ ,  $\forall \mathbf{x} \in X$ , and nonpositive if  $h(\mathbf{x}) \leq 0$ ,  $\forall \mathbf{x} \in X$ .

The Tables 6–11 containing the special structure rules are read as Boolean logic tables, if we name the property (either monotonicity or convexity) of  $k = g \circ h$  as  $C$ , and the conditions on the convexity, monotonicity and image of  $g$  and  $h$  as  $A_i$ ,  $i = 1 \dots n$ , then each row of the table is equivalent to the implication  $\bigwedge_{i=1}^n A_i \Rightarrow C$ .

To understand the monotonicity rules [9] of  $k(\mathbf{x})$  we compute the gradient of  $k$

$$\nabla k(\mathbf{x}) = \nabla g(h(\mathbf{x})) \nabla h(\mathbf{x})$$

and it follows that

**Table 2** Interval arithmetic rules for  $[x_1^L, x_1^U] + [x_2^L, x_2^U]$  and  $[x_1^L, x_1^U] - [x_2^L, x_2^U]$  [33].

| Addition            | $[-\infty, x_2^U]$         | $[x_2^L, x_2^U]$                 | $[x_2^L, \infty]$          | $[-\infty, \infty]$ |
|---------------------|----------------------------|----------------------------------|----------------------------|---------------------|
| $[-\infty, x_1^U]$  | $[-\infty, x_1^U + x_2^U]$ | $[-\infty, x_1^U + x_2^U]$       | $[-\infty, \infty]$        | $[-\infty, \infty]$ |
| $[x_1^L, x_1^U]$    | $[-\infty, x_1^U + x_2^U]$ | $[x_1^L + x_2^L, x_1^U + x_2^U]$ | $[x_1^L + x_2^L, \infty]$  | $[-\infty, \infty]$ |
| $[x_1^L, \infty]$   | $[-\infty, \infty]$        | $[x_1^L + x_2^L, \infty]$        | $[x_1^L + x_2^L, \infty]$  | $[-\infty, \infty]$ |
| $[-\infty, \infty]$ | $[-\infty, \infty]$        | $[-\infty, \infty]$              | $[-\infty, \infty]$        | $[-\infty, \infty]$ |
| Subtraction         | $[-\infty, x_2^U]$         | $[x_2^L, x_2^U]$                 | $[x_2^L, \infty]$          | $[-\infty, \infty]$ |
| $[-\infty, x_1^U]$  | $[-\infty, \infty]$        | $[-\infty, x_1^U - x_2^L]$       | $[-\infty, x_1^U - x_2^L]$ | $[-\infty, \infty]$ |
| $[x_1^L, x_1^U]$    | $[x_1^L - x_2^U, \infty]$  | $[x_1^L - x_2^U, x_1^U - x_2^L]$ | $[-\infty, x_1^U - x_2^L]$ | $[-\infty, \infty]$ |
| $[x_1^L, \infty]$   | $[x_1^L - x_2^U, \infty]$  | $[x_1^L - x_2^U, \infty]$        | $[-\infty, \infty]$        | $[-\infty, \infty]$ |
| $[-\infty, \infty]$ | $[-\infty, \infty]$        | $[-\infty, \infty]$              | $[-\infty, \infty]$        | $[-\infty, \infty]$ |

**Table 3** Interval arithmetic rules for  $[x_1^L, x_1^U] \times [x_2^L, x_2^U]$  [33].

| Multiplication                      | $[x_2^L, x_2^U]$<br>$x_2^L \leq 0$       | $[x_2^L, x_2^U]$<br>$x_2^L < 0 < x_2^U$                                                    | $[x_2^L, x_2^U]$<br>$x_2^L \geq 0$       | $[0, 0]$ | $[-\infty, x_2^U]$<br>$x_2^U \leq 0$ | $[-\infty, x_2^U]$<br>$x_2^U \geq 0$ | $[x_2^L, \infty]$<br>$x_2^L \leq 0$ | $[x_2^L, \infty]$<br>$x_2^L \geq 0$ | $[-\infty, \infty]$ |
|-------------------------------------|------------------------------------------|--------------------------------------------------------------------------------------------|------------------------------------------|----------|--------------------------------------|--------------------------------------|-------------------------------------|-------------------------------------|---------------------|
| $[x_1^L, x_1^U], x_1^U \leq 0$      | $[x_1^U \cdot x_2^U, x_1^L \cdot x_2^L]$ | $[x_1^L \cdot x_2^U, x_1^U \cdot x_2^L]$                                                   | $[x_1^L \cdot x_2^L, x_1^U \cdot x_2^L]$ | $[0, 0]$ | $[x_1^U \cdot x_2^U, \infty]$        | $[x_1^L \cdot x_2^U, \infty]$        | $[-\infty, x_1^L \cdot x_2^L]$      | $[-\infty, x_1^U \cdot x_2^L]$      | $[-\infty, \infty]$ |
| $[x_1^L, x_1^U], x_1^L < 0 < x_1^U$ | $[x_1^U \cdot x_2^U, x_1^L \cdot x_2^L]$ | $[\min(x_1^L \cdot x_2^U, x_1^U \cdot x_2^L), \max(x_1^L \cdot x_2^L, x_1^U \cdot x_2^U)]$ | $[x_1^L \cdot x_2^L, x_1^U \cdot x_2^L]$ | $[0, 0]$ | $[-\infty, \infty]$                  | $[-\infty, \infty]$                  | $[-\infty, \infty]$                 | $[-\infty, \infty]$                 | $[-\infty, \infty]$ |
| $[x_1^L, x_1^U], x_1^L \geq 0$      | $[x_1^U \cdot x_2^U, x_1^L \cdot x_2^L]$ | $[x_1^L \cdot x_2^L, x_1^U \cdot x_2^L]$                                                   | $[x_1^L \cdot x_2^L, x_1^U \cdot x_2^L]$ | $[0, 0]$ | $[-\infty, x_1^L \cdot x_2^L]$       | $[-\infty, x_1^U \cdot x_2^L]$       | $[x_1^L \cdot x_2^L, \infty]$       | $[x_1^U \cdot x_2^L, \infty]$       | $[-\infty, \infty]$ |
| $[0, 0]$                            | $[0, 0]$                                 | $[0, 0]$                                                                                   | $[0, 0]$                                 | $[0, 0]$ | $[0, 0]$                             | $[0, 0]$                             | $[0, 0]$                            | $[0, 0]$                            | $[0, 0]$            |
| $[-\infty, x_1^U], x_1^U \leq 0$    | $[x_1^U \cdot x_2^U, \infty]$            | $[-\infty, \infty]$                                                                        | $[-\infty, x_1^U \cdot x_2^L]$           | $[0, 0]$ | $[x_1^U \cdot x_2^U, \infty]$        | $[-\infty, \infty]$                  | $[-\infty, \infty]$                 | $[-\infty, x_1^U \cdot x_2^L]$      | $[-\infty, \infty]$ |
| $[-\infty, x_1^U], x_1^U \geq 0$    | $[x_1^U \cdot x_2^U, \infty]$            | $[-\infty, \infty]$                                                                        | $[-\infty, x_1^U \cdot x_2^L]$           | $[0, 0]$ | $[-\infty, \infty]$                  | $[-\infty, \infty]$                  | $[-\infty, \infty]$                 | $[-\infty, \infty]$                 | $[-\infty, \infty]$ |
| $[x_1^L, \infty], x_1^L \leq 0$     | $[-\infty, x_1^L \cdot x_2^L]$           | $[-\infty, \infty]$                                                                        | $[x_1^L \cdot x_2^L, \infty]$            | $[0, 0]$ | $[-\infty, \infty]$                  | $[-\infty, \infty]$                  | $[-\infty, \infty]$                 | $[-\infty, \infty]$                 | $[-\infty, \infty]$ |
| $[x_1^L, \infty], x_1^L \geq 0$     | $[-\infty, x_1^L \cdot x_2^L]$           | $[-\infty, \infty]$                                                                        | $[x_1^L \cdot x_2^L, \infty]$            | $[0, 0]$ | $[-\infty, x_1^L \cdot x_2^L]$       | $[-\infty, \infty]$                  | $[-\infty, \infty]$                 | $[x_1^L \cdot x_2^L, \infty]$       | $[-\infty, \infty]$ |
| $[-\infty, \infty]$                 | $[-\infty, \infty]$                      | $[-\infty, \infty]$                                                                        | $[-\infty, \infty]$                      | $[0, 0]$ | $[-\infty, \infty]$                  | $[-\infty, \infty]$                  | $[-\infty, \infty]$                 | $[-\infty, \infty]$                 | $[-\infty, \infty]$ |

**Table 4** Interval arithmetic rules for  $[x_1^L, x_1^U] \div [x_2^L, x_2^U]$ ,  $0 \notin [x_2^L, x_2^U]$  [33].

| Division                            | $[x_2^L, x_2^U]$<br>$x_2^U < 0$        | $[x_2^L, x_2^U]$<br>$x_2^L > 0$        | $[-\infty, x_2^U]$<br>$x_2^U < 0$      | $[x_2^L, \infty]$<br>$x_2^L > 0$       |
|-------------------------------------|----------------------------------------|----------------------------------------|----------------------------------------|----------------------------------------|
| $[x_1^L, x_1^U], x_1^U \leq 0$      | $[x_1^U \div x_2^U, x_1^L \div x_2^L]$ | $[x_1^L \div x_2^L, x_1^U \div x_2^L]$ | $[0, x_1^L \div x_2^L]$                | $[x_1^L \div x_2^L, 0]$                |
| $[x_1^L, x_1^U], x_1^L < 0 < x_1^U$ | $[x_1^U \div x_2^U, x_1^L \div x_2^L]$ | $[x_1^L \div x_2^L, x_1^U \div x_2^L]$ | $[x_1^U \div x_2^U, x_1^L \div x_2^L]$ | $[x_1^L \div x_2^L, x_1^U \div x_2^L]$ |
| $[x_1^L, x_1^U], x_1^L \geq 0$      | $[x_1^U \div x_2^U, x_1^L \div x_2^L]$ | $[x_1^L \div x_2^L, x_1^U \div x_2^L]$ | $[x_1^U \div x_2^U, 0]$                | $[0, x_1^U \div x_2^L]$                |
| $[0, 0]$                            | $[0, 0]$                               | $[0, 0]$                               | $[0, 0]$                               | $[0, 0]$                               |
| $[-\infty, x_1^U], x_1^U \leq 0$    | $[x_1^U \div x_2^U, \infty]$           | $[-\infty, x_1^U \div x_2^L]$          | $[0, \infty]$                          | $[-\infty, 0]$                         |
| $[-\infty, x_1^U], x_1^U \geq 0$    | $[x_1^U \div x_2^U, \infty]$           | $[-\infty, x_1^U \div x_2^L]$          | $[x_1^U \div x_2^U, \infty]$           | $[-\infty, x_1^U \div x_2^L]$          |
| $[x_1^L, \infty], x_1^L \leq 0$     | $[-\infty, x_1^L \div x_2^L]$          | $[x_1^L \div x_2^L, \infty]$           | $[-\infty, x_1^L \div x_2^L]$          | $[x_1^L \div x_2^L, \infty]$           |
| $[x_1^L, \infty], x_1^L \geq 0$     | $[-\infty, x_1^L \div x_2^L]$          | $[x_1^L \div x_2^L, \infty]$           | $[-\infty, 0]$                         | $[0, \infty]$                          |
| $[-\infty, \infty]$                 | $[-\infty, \infty]$                    | $[-\infty, \infty]$                    | $[-\infty, \infty]$                    | $[-\infty, \infty]$                    |

- $k$  is nondecreasing if  $g$  and  $h$  are nondecreasing
- $k$  is nondecreasing if  $g$  and  $h$  are nonincreasing
- $k$  is nonincreasing if  $g$  is nondecreasing and  $h$  is nonincreasing
- $k$  is nonincreasing if  $g$  is nonincreasing and  $h$  is nondecreasing

Expression monotonicity of an expression only depends on the monotonicity and bounds of its children, so SUSPECT does not compute derivatives at runtime and only relies on the rules derived from the previous base rules. For nondifferentiable functions, we produce rules for domains where they are differentiable. For example, the function  $k(\mathbf{x}) = |h(\mathbf{x})|$  is not differentiable, but if we restrict  $h(\mathbf{x})$  to be either nonnegative or nonpositive, then  $k(\mathbf{x})$  reduces to  $k(\mathbf{x}) = h(\mathbf{x})$  and  $k(\mathbf{x}) = -h(\mathbf{x})$  respectively. Table 6 contains the rules to determine the monotonicity of unary functions, Table 8 contains the rules for binary functions, and Table 7 contains the rules for power functions.

**Table 5** Interval arithmetic rules for  $[x_1^L, x_1^U] \div [x_2^L, x_2^U]$ ,  $0 \in [x_2^L, x_2^U]$  [33].

| Division                                  | $[0, 0]$            | $[x_2^L, 0]$                  | $[0, x_2^U]$                  | $[-\infty, 0]$      | $[0, \infty]$       | $[-\infty, \infty]$ |
|-------------------------------------------|---------------------|-------------------------------|-------------------------------|---------------------|---------------------|---------------------|
| $[x_1^L, x_1^U], x_1^U < 0$               | $\emptyset$         | $[x_1^U \div x_2^L, \infty]$  | $[-\infty, x_1^U \div x_2^U]$ | $[0, \infty]$       | $[-\infty, 0]$      | $[-\infty, \infty]$ |
| $[x_1^L, x_1^U], x_1^L \leq 0 \leq x_1^U$ | $[-\infty, \infty]$ | $[-\infty, \infty]$           | $[-\infty, \infty]$           | $[-\infty, \infty]$ | $[-\infty, \infty]$ | $[-\infty, \infty]$ |
| $[x_1^L, x_1^U], x_1^L > 0$               | $\emptyset$         | $[-\infty, x_1^L \div x_2^L]$ | $[x_1^L \div x_2^U, \infty]$  | $[-\infty, 0]$      | $[0, \infty]$       | $[-\infty, \infty]$ |
| $[-\infty, x_1^U], x_1^U < 0$             | $\emptyset$         | $[x_1^U \div x_2^L, \infty]$  | $[-\infty, x_1^U \div x_2^U]$ | $[0, \infty]$       | $[-\infty, 0]$      | $[-\infty, \infty]$ |
| $[-\infty, x_1^U], x_1^U > 0$             | $[-\infty, \infty]$ | $[-\infty, \infty]$           | $[-\infty, \infty]$           | $[-\infty, \infty]$ | $[-\infty, \infty]$ | $[-\infty, \infty]$ |
| $[x_1^L, \infty], x_1^L < 0$              | $[-\infty, \infty]$ | $[-\infty, \infty]$           | $[-\infty, \infty]$           | $[-\infty, \infty]$ | $[-\infty, \infty]$ | $[-\infty, \infty]$ |
| $[x_1^L, \infty], x_1^L > 0$              | $\emptyset$         | $[-\infty, x_1^L \div x_2^L]$ | $[x_1^L \div x_2^U, \infty]$  | $[-\infty, 0]$      | $[0, \infty]$       | $[-\infty, \infty]$ |
| $[-\infty, \infty]$                       | $[-\infty, \infty]$ | $[-\infty, \infty]$           | $[-\infty, \infty]$           | $[-\infty, \infty]$ | $[-\infty, \infty]$ | $[-\infty, \infty]$ |

Similarly to monotonicity detection, recursive rules compute convexity. We define the convexity of an expression as linear, convex, concave, or indefinite. Variables and constants are always linear. We can examine the rules used to determine the convexity of the composition  $k = g \circ h$  [9]. First we consider the case where the function  $g$  depends on one argument only, that is when  $l = 1$ ,  $g : \mathbb{R} \rightarrow \mathbb{R}$ ,  $h : \mathbb{R}^n \rightarrow \mathbb{R}$ , and the second derivative of  $k$  is

$$k''(\mathbf{x}) = g''(h(\mathbf{x}))[\nabla h(\mathbf{x})]^2 + g'(h(\mathbf{x}))\nabla^2 h(\mathbf{x})$$

- $k$  is convex if  $g$  is convex and nondecreasing over  $Z$  and  $h$  is convex
- $k$  is convex if  $g$  is convex and nonincreasing over  $Z$  and  $h$  is concave
- $k$  is concave if  $g$  is concave and nondecreasing over  $Z$  and  $h$  is concave
- $k$  is concave if  $g$  is concave and nonincreasing over  $Z$  and  $g$  is convex

If we consider the general case where  $l \geq 1$ , then the function  $k$  is:

$$k(\mathbf{x}) = g(h(\mathbf{x})) = g(h_1(\mathbf{x}), \dots, h_l(\mathbf{x}))$$

its Hessian is

$$\nabla^2 k(\mathbf{x}) = \nabla h(\mathbf{x})^T \nabla^2 g(h(\mathbf{x})) \nabla h(\mathbf{x}) + \nabla g(h(\mathbf{x})) \nabla^2 h(\mathbf{x})$$

and we can derive the following rules:

- $k$  is convex if  $g$  is convex and nondecreasing in each argument, and all  $h_i$  are convex
- $k$  is convex if  $g$  is convex and nonincreasing in each argument, and all  $h_i$  are concave
- $k$  is concave if  $g$  is concave and nondecreasing in each argument, and all  $h_i$  are concave
- $k$  is concave if  $g$  is concave and nonincreasing in each argument, and all  $h_i$  are convex

Table 9 contains the rules to determine the convexity of unary functions, Table 11 contains the rules for binary functions, and Table 10 contains the rules for power functions.

## D The Bound Interface

SUSPECT deals with floating point numerical issues by encapsulating all operations that can introduce numerical errors in the Bound interface. Users can provide an implementation of this interface that uses, for example, safe interval arithmetic. Table 12 contains a list of abstract methods that implementations have to implement.

**Table 6** Monotonicity rules for unary functions. The monotonicity of  $g \circ h$  is the conjunction of the conditions on the monotonicity and image of  $h$ , and some additional conditions, e.g.  $|h|$  is nondecreasing if  $h$  is nondecreasing and nonnegative.

|             | $g \circ h$                                                      |                                                                  | $h$                                                      |  | Additional Conditions                                                                        |
|-------------|------------------------------------------------------------------|------------------------------------------------------------------|----------------------------------------------------------|--|----------------------------------------------------------------------------------------------|
|             | monotonicity                                                     | monotonicity                                                     | image                                                    |  |                                                                                              |
| $-h$        | nondecreasing<br>nonincreasing                                   | nonincreasing<br>nondecreasing                                   | any<br>any                                               |  |                                                                                              |
| $ h $       | nondecreasing<br>nonincreasing<br>nondecreasing<br>nonincreasing | nondecreasing<br>nonincreasing<br>nonincreasing<br>nondecreasing | nonnegative<br>nonnegative<br>nonpositive<br>nonpositive |  |                                                                                              |
| $\sqrt{h}$  | nondecreasing<br>nonincreasing                                   | nondecreasing<br>nonincreasing                                   | any<br>any                                               |  |                                                                                              |
| $e^h$       | nondecreasing<br>nonincreasing                                   | nondecreasing<br>nonincreasing                                   | any<br>any                                               |  |                                                                                              |
| $\log h$    | nondecreasing<br>nonincreasing                                   | nondecreasing<br>nonincreasing                                   | any<br>any                                               |  |                                                                                              |
| $\sin h$    | nondecreasing<br>nondecreasing<br>nonincreasing<br>nonincreasing | nondecreasing<br>nonincreasing<br>nonincreasing<br>nondecreasing | any<br>any<br>any<br>any                                 |  | $\cos h$ nonnegative<br>$\cos h$ nonpositive<br>$\cos h$ nonnegative<br>$\cos h$ nonpositive |
| $\cos h$    | nondecreasing<br>nondecreasing<br>nonincreasing<br>nonincreasing | nonincreasing<br>nondecreasing<br>nondecreasing<br>nonincreasing | any<br>any<br>any<br>any                                 |  | $\sin h$ nonnegative<br>$\sin h$ nonpositive<br>$\sin h$ nonnegative<br>$\sin h$ nonpositive |
| $\tan h$    | nondecreasing<br>nonincreasing                                   | nondecreasing<br>nonincreasing                                   | any<br>any                                               |  |                                                                                              |
| $\arcsin h$ | nondecreasing<br>nonincreasing                                   | nondecreasing<br>nonincreasing                                   | any<br>any                                               |  |                                                                                              |
| $\arccos h$ | nondecreasing<br>nonincreasing                                   | nonincreasing<br>nondecreasing                                   | any<br>any                                               |  |                                                                                              |
| $\arctan h$ | nondecreasing<br>nonincreasing                                   | nondecreasing<br>nonincreasing                                   | any<br>any                                               |  |                                                                                              |

**Table 7** Monotonicity rules for power functions. If both the base and the exponent are not constant, then we do not infer expression monotonicity. The monotonicity of  $g \circ h$  is the conjunction of the monotonicity conditions and image of  $h$ , e.g.  $g^{2i}$ ,  $i = 1, 2, \dots$  is nondecreasing if  $g$  is nondecreasing and nonnegative.

|               | $g \circ h$<br>monotonicity | $g$<br>monotonicity | image        | Additional Conditions                    |
|---------------|-----------------------------|---------------------|--------------|------------------------------------------|
| $\alpha^g$    | nondecreasing               | nondecreasing       | nonpositive  | $0 < \alpha < 1$                         |
|               | nondecreasing               | nonincreasing       | nonnegative  | $0 < \alpha < 1$                         |
|               | nondecreasing               | nondecreasing       | nonnegative  | $\alpha \geq 1$                          |
|               | nondecreasing               | nonincreasing       | nonpositive  | $\alpha \geq 1$                          |
| $g^\alpha$    | constant                    | any                 | any          | $\alpha = 0$                             |
|               | nondecreasing               | nondecreasing       | any          | $\alpha = 1$                             |
|               | nonincreasing               | nonincreasing       | any          | $\alpha = 1$                             |
|               | nondecreasing               | nondecreasing       | nonnegative  | $\alpha = 2i \quad i = 1, 2, \dots$      |
|               | nondecreasing               | nonincreasing       | nonpositive  | $\alpha = 2i \quad i = 1, 2, \dots$      |
|               | nonincreasing               | nondecreasing       | nonpositive  | $\alpha = 2i \quad i = 1, 2, \dots$      |
|               | nonincreasing               | nonincreasing       | nonnegative  | $\alpha = 2i \quad i = 1, 2, \dots$      |
|               | nondecreasing               | nondecreasing       | nonpositive  | $\alpha = -2i \quad i = 1, 2, \dots$     |
|               | nondecreasing               | nonincreasing       | nonnegative  | $\alpha = -2i \quad i = 1, 2, \dots$     |
|               | nonincreasing               | nondecreasing       | nonnegative  | $\alpha = -2i \quad i = 1, 2, \dots$     |
|               | nonincreasing               | nonincreasing       | nonpositive  | $\alpha = -2i \quad i = 1, 2, \dots$     |
|               | nondecreasing               | nondecreasing       | any          | $\alpha = 2i + 1 \quad i = 1, 2, \dots$  |
|               | nonincreasing               | nonincreasing       | any          | $\alpha = 2i + 1 \quad i = 1, 2, \dots$  |
|               | nondecreasing               | nonincreasing       | any          | $\alpha = -2i + 1 \quad i = 1, 2, \dots$ |
|               | nonincreasing               | nondecreasing       | any          | $\alpha = -2i + 1 \quad i = 1, 2, \dots$ |
|               | nondecreasing               | nondecreasing       | nonnegative  | $\alpha > 0$                             |
|               | nonincreasing               | nonincreasing       | nonnegative  | $\alpha > 0$                             |
|               | nondecreasing               | nonincreasing       | nonnegative  | $\alpha < 0$                             |
| nonincreasing | nondecreasing               | nonnegative         | $\alpha < 0$ |                                          |

**Table 8** Monotonicity rules for binary functions in the form  $g \circ h$ . The monotonicity of  $g \circ h$  is the conjunction of the monotonicity conditions and image of  $h$ , and some additional conditions, e.g.  $g + h$  is nondecreasing if both  $g$  and  $h$  are nondecreasing.

|               | $g \circ h$   |               | $g$           |               | $h$         |  |
|---------------|---------------|---------------|---------------|---------------|-------------|--|
|               | monotonicity  | monotonicity  | image         | monotonicity  | image       |  |
| $g + h$       | nondecreasing | nondecreasing | any           | nondecreasing | any         |  |
|               | nonincreasing | nonincreasing | any           | nonincreasing | any         |  |
| $gh$          | nondecreasing | nondecreasing | any           | constant      | nonnegative |  |
|               | nondecreasing | nonincreasing | any           | constant      | nonpositive |  |
|               | nonincreasing | nondecreasing | any           | constant      | nonpositive |  |
|               | nonincreasing | nonincreasing | any           | constant      | nonnegative |  |
|               | nondecreasing | nondecreasing | nonnegative   | nondecreasing | nonnegative |  |
|               | nondecreasing | nondecreasing | nonpositive   | nonincreasing | nonnegative |  |
|               | nondecreasing | nonincreasing | nonnegative   | nondecreasing | nonpositive |  |
|               | nondecreasing | nonincreasing | nonpositive   | nonincreasing | nonpositive |  |
|               | nonincreasing | nonincreasing | nonnegative   | nonincreasing | nonnegative |  |
|               | nonincreasing | nondecreasing | nonnegative   | nondecreasing | nonpositive |  |
| $g/h$         | nondecreasing | nondecreasing | any           | constant      | nonnegative |  |
|               | nondecreasing | nonincreasing | any           | constant      | nonpositive |  |
|               | nonincreasing | nondecreasing | any           | constant      | nonpositive |  |
|               | nonincreasing | nonincreasing | any           | constant      | nonnegative |  |
|               | nondecreasing | nondecreasing | nonnegative   | nonincreasing | nonnegative |  |
|               | nondecreasing | nondecreasing | nonpositive   | nondecreasing | nonnegative |  |
|               | nondecreasing | nonincreasing | nonnegative   | nonincreasing | nonpositive |  |
|               | nondecreasing | nonincreasing | nonpositive   | nondecreasing | nonpositive |  |
|               | nonincreasing | nonincreasing | nonnegative   | nondecreasing | nonnegative |  |
|               | nonincreasing | nondecreasing | nonnegative   | nonincreasing | nonpositive |  |
| nonincreasing | nondecreasing | nonpositive   | nonincreasing | nonpositive   |             |  |

**Table 9** Convexity rules for unary functions. The convexity of  $g \circ h$  is the conjunction of the conditions on the convexity and image of  $h$ , and some additional conditions. For example,  $|h|$  is convex if  $h$  is linear, or if  $h$  is convex and nonnegative, or if  $h$  is concave and nonpositive.

|             | $g \circ h$<br>convexity                                    | $h$<br>convexity                                           | $h$<br>image                           | Additional Conditions                                                                                                                                                                                                                  |
|-------------|-------------------------------------------------------------|------------------------------------------------------------|----------------------------------------|----------------------------------------------------------------------------------------------------------------------------------------------------------------------------------------------------------------------------------------|
| $-h$        | convex<br>concave                                           | concave<br>convex                                          | any<br>any                             |                                                                                                                                                                                                                                        |
| $ h $       | convex<br>convex<br>convex                                  | linear<br>convex<br>concave                                | any<br>nonnegative<br>nonpositive      |                                                                                                                                                                                                                                        |
| $\sqrt{h}$  | concave                                                     | concave                                                    | nonnegative                            |                                                                                                                                                                                                                                        |
| $e^h$       | convex                                                      | convex                                                     | any                                    |                                                                                                                                                                                                                                        |
| $\log h$    | concave                                                     | concave                                                    | nonnegative                            |                                                                                                                                                                                                                                        |
| $\sinh$     | concave<br>concave<br>concave<br>convex<br>convex<br>convex | linear<br>convex<br>concave<br>linear<br>concave<br>convex | any<br>any<br>any<br>any<br>any<br>any | $\sinh$ nonnegative<br>$\sinh$ nonnegative and $\cosh$ nonpositive<br>$\sinh$ nonnegative and $\cosh$ nonnegative<br>$\sinh$ nonpositive<br>$\sinh$ nonpositive and $\cosh$ nonpositive<br>$\sinh$ nonpositive and $\cosh$ nonnegative |
| $\cosh$     | concave<br>concave<br>concave<br>convex<br>convex<br>convex | linear<br>convex<br>concave<br>linear<br>concave<br>convex | any<br>any<br>any<br>any<br>any<br>any | $\cosh$ nonnegative<br>$\cosh$ nonnegative and $\sinh$ nonpositive<br>$\cosh$ nonnegative and $\sinh$ nonnegative<br>$\cosh$ nonpositive<br>$\cosh$ nonpositive and $\sinh$ nonpositive<br>$\cosh$ nonpositive and $\sinh$ nonnegative |
| $\tanh$     | convex<br>concave                                           | convex<br>concave                                          | any<br>any                             | $\tanh$ nonnegative<br>$\tanh$ nonpositive                                                                                                                                                                                             |
| $\arcsin h$ | convex<br>concave                                           | convex<br>concave                                          | any<br>any                             | $\arcsin h$ nonnegative<br>$\arcsin h$ nonpositive                                                                                                                                                                                     |
| $\arccos h$ | convex<br>concave                                           | concave<br>convex                                          | any<br>any                             | $\arccos h$ nonpositive<br>$\arccos h$ nonnegative                                                                                                                                                                                     |
| $\arctan h$ | convex<br>concave                                           | convex<br>concave                                          | nonpositive<br>nonnegative             |                                                                                                                                                                                                                                        |

**Table 10** Convexity rules for power functions. If both the base and the exponent are not constant, then we can't infer the convexity of the expression. The convexity of  $g \circ h$  is the conjunction of the conditions on the convexity and image of  $h$ , and some additional conditions. For example,  $g^{2i}$ ,  $i = 1, 2, \dots$  is convex if  $g$  is linear, or if  $g$  is convex and nonnegative, or if  $g$  is concave and nonpositive.

|            | convexity | convexity   | $g$<br>image | Additional Conditions                   |
|------------|-----------|-------------|--------------|-----------------------------------------|
| $\alpha^g$ | convex    | concave     | any          | $0 < \alpha < 1$                        |
|            | convex    | convex      | any          | $\alpha \geq 1$                         |
| $g^\alpha$ | linear    | any         | any          | $\alpha = 0$                            |
|            | linear    | linear      | any          | $\alpha = 1$                            |
|            | convex    | convex      | any          | $\alpha = 1$                            |
|            | concave   | concave     | any          | $\alpha = 1$                            |
|            | convex    | linear      | any          | $\alpha = 2i \quad i = 1, 2, \dots$     |
|            | convex    | convex      | nonnegative  | $\alpha = 2i \quad i = 1, 2, \dots$     |
|            | convex    | concave     | nonpositive  | $\alpha = 2i \quad i = 1, 2, \dots$     |
|            | convex    | convex      | nonpositive  | $\alpha = -2i \quad i = 1, 2, \dots$    |
|            | convex    | concave     | nonpositive  | $\alpha = -2i \quad i = 1, 2, \dots$    |
|            | convex    | convex      | nonnegative  | $\alpha = -2i \quad i = 1, 2, \dots$    |
|            | convex    | concave     | nonpositive  | $\alpha = -2i \quad i = 1, 2, \dots$    |
|            | convex    | convex      | nonnegative  | $\alpha = 2i + 1 \quad i = 1, 2, \dots$ |
|            | convex    | concave     | nonpositive  | $\alpha = 2i + 1 \quad i = 1, 2, \dots$ |
|            | convex    | convex      | nonnegative  | $\alpha > 1$                            |
|            | convex    | concave     | nonnegative  | $\alpha < 0$                            |
|            | convex    | convex      | nonnegative  | $0 < \alpha < 1$                        |
| convex     | convex    | nonnegative | $\alpha < 0$ |                                         |

**Table 11** Convexity rules for binary functions in the form  $g \circ h$ . The convexity of  $g \circ h$  is the conjunction of the conditions on the convexity and image of  $h$ , e.g.  $g + h$  is convex if both  $g$  and  $h$  are convex.

|         | $g \circ h$<br>convexity | convexity | $g$<br>image | convexity | $h$<br>image |
|---------|--------------------------|-----------|--------------|-----------|--------------|
| $g + h$ | convex                   | convex    | any          | convex    | any          |
|         | convex                   | convex    | any          | convex    | any          |
| $gh$    | convex                   | convex    | any          | constant  | nonnegative  |
|         | convex                   | convex    | any          | constant  | nonpositive  |
|         | convex                   | convex    | any          | constant  | nonpositive  |
|         | convex                   | convex    | any          | constant  | nonnegative  |
| $g/h$   | convex                   | convex    | any          | constant  | positive     |
|         | convex                   | convex    | any          | constant  | negative     |
|         | convex                   | convex    | any          | constant  | negative     |
|         | convex                   | convex    | any          | constant  | positive     |
|         | convex                   | constant  | nonnegative  | convex    | positive     |
|         | convex                   | constant  | nonpositive  | convex    | negative     |
|         | convex                   | constant  | nonnegative  | convex    | negative     |
|         | convex                   | constant  | nonpositive  | convex    | positive     |



**Table 12** Description of the Bound interface methods required by concrete interface implementations.

| method                             | description                                                         |
|------------------------------------|---------------------------------------------------------------------|
| <code>is_zero(self)</code>         | Return True if the bound is $[0,0]$                                 |
| <code>is_positive(self)</code>     | Return True if the lower bound is greater than 0                    |
| <code>is_negative(self)</code>     | Return True if the upper bound is less than 0                       |
| <code>is_nonnegative(self)</code>  | Return True if the lower bound is greater than or equal to 0        |
| <code>is_nonpositive(self)</code>  | Return True if the upper bound is less than or equal to 0           |
| <code>tighten(self, other)</code>  | Return a new bound which is the intersection of the two bounds      |
| <code>add(self, other)</code>      | Return a new bound which is the sum of the two bounds               |
| <code>sub(self, other)</code>      | Return a new bound which is the difference of the two bounds        |
| <code>mul(self, other)</code>      | Return a new bound which is the product of the two bounds           |
| <code>div(self, other)</code>      | Return a new bound which is the quotient of the two bounds          |
| <code>equals(self, other)</code>   | Return True if the two bounds are equal                             |
| <code>contains(self, other)</code> | Return True if <code>other</code> is contained in <code>self</code> |
| <code>zero()</code>                | Return a new bound for which <code>is_zero</code> is True           |
| <code>size(self)</code>            | Return the size of the bound                                        |

## E RecLMTD Convexity Detector Implementation

This section contains the implementation of a convexity detector for the reciprocal of log mean temperature difference with the limits defined:

$$\text{RecLMTD}^\beta(x,y) = \begin{cases} \left(\frac{\ln(x/y)}{x-y}\right)^\beta & x \neq y, \\ 1/x^\beta & x = y, \end{cases}$$

with variables  $x, y \in \mathbb{R}_+$ , and constant parameter  $\beta \geq -1$ . We can extend SUSPECT to detect this type of expression by inspecting power expressions that match the subgraph shown in Figure 7 for the case  $x \neq y$  and division expressions for the case  $x = y$ .

**Listing 1** Detector class for the  $\text{RecLMTD}^\beta$  expression defined in Equation (E).

```

from suspect.ext import ConvexityDetector, Convexity
import suspect.dag.expressions as dex

class RecLMTDDetector(ConvexityDetector):
    def register_handlers(self):
        return {
            dex.DivisionExpression: self.visit_division,
            dex.PowExpression: self.visit_power,
        }

    def visit_division(self, expr, ctx):
        # Method definition in Listing 2

    def visit_power(self, expr, ctx):
        # Method definition in Listing 3

    def _convexity_from_beta(self, beta):
        """Return expression convexity based on value of exponent."""
        if beta > 0:
            return Convexity.Convex
        elif beta == 0:
            return Convexity.Linear
        elif -1 <= beta < 0:
            return Convexity.Concave

```

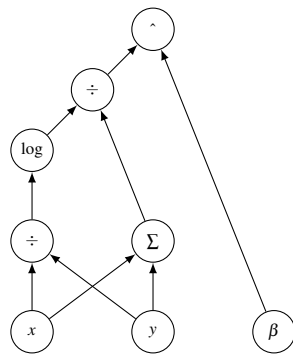

**Fig. 7** Graph structure of  $\text{RecLMTD}^\beta$  expression. Vertices  $x$  and  $y$  are positive variables, and node  $\log$  represent the natural log.

**Listing 2** Detector method for the expression  $1/x^\beta$  defined in Equation (E).

```

def visit_division(self, expr, ctx):
    num, den = expr.children
    # numerator has to be 1.0
    if not isinstance(num, dex.Constant) or expr.value != 1.0:
        return

    # denominator has to be power with beta >= -1.0
    if not isinstance(den, dex.PowExpression):
        return
    base, expo = den.children
    if not isinstance(expo, dex.Constant) or expo.value < -1.0:
        return
    if not isinstance(base, dex.Variable):
        return

    bound = ctx.bound[base]
    if bound.is_nonnegative():
        return self._convexity_from_beta(expo.value)
  
```

**Listing 3** Detector method for the expression  $(\ln(x)/(x-y))^\beta$  defined in Equation (E).

```

def visit_power(self, expr, ctx):
    base, expo = expr.children
    # check exponent is a constant term >= -1.0
    if not isinstance(expo, dex.Constant) or expo.value < -1.0:
        return
    # check base is a division
    if not isinstance(base, dex.DivisionExpression):
        return

    num, den = base.children
    # Check numerator is log expression
    if not isinstance(num, dex.LogExpression):
        return
    # Check denominator is linear expression
    if not isinstance(den, dex.LinearExpression):
        return

    # Check expression inside log is a division
    if not isinstance(num.children[0], dex.DivisionExpression):
        return

    # Check the denominator linear expression has two elements
    if len(den.children) != 2:
        return

    x, y = den.children
    bound_x = ctx.bound[x]
    bound_y = ctx.bound[y]
    c_x, c_y = den.coefficients

    inner_div = num.children[0]
    inner_num, inner_den = inner_div.children

    # Check both x and y are positive
    if bound_x.lower_bound <= 0 or bound_y.lower_bound <= 0:
        return

    # Use coefficients to determine which variable has to
    # be the numerator and denominator in the inner division
    if c_x == 1 and c_y == -1:
        # x - y
        if inner_num is x and inner_den is y:
            return self._convexity_from_beta(expo.value)
    elif c_x == -1 and c_y == 1:
        # y - x
        if inner_num is y and inner_den is x:
            return self._convexity_from_beta(expo.value)

```

**Listing 4** Example `setup.py` file used to register the detector of Listing 1 with SUSPECT.

```
from setuptools import setup, find_packages

setup(
    name='rec_lmtdd_detector',
    packages=find_packages(),
    entry_points={
        # register rec_lmtdd_detector as SUSPECT convexity detector plugin
        'suspect.convexity_detection': [
            'rec_lmtdd=rec_lmtdd_detector:RecLMTDDetector'
        ]
    },
    # ensure SUSPECT package is installed
    requires=['cog-suspect']
)
```

## F Results

This Appendix contains a more detailed breakdown of the computational results. Table 13 contains a list of instances that SUSPECT is able to process correctly, but that because of the problem size it takes over 10 seconds of processing time. Table 14 contains a list of instances where SUSPECT is not able to terminate within the 5 minutes timeout. Finally, Table 15 contains the problems where we don't identify convexity correctly, instances marked with a dagger<sup>†</sup> fail because of numerical errors when computing eigenvalues.

**Table 13** List of instances where we correctly detected the convexity properties in over 10 seconds.

|                         |                        |                      |
|-------------------------|------------------------|----------------------|
| arki0008                | arki0018               | autocorr_bern35-35   |
| autocorr_bern40-30      | autocorr_bern40-40     | autocorr_bern45-23   |
| autocorr_bern45-34      | autocorr_bern45-45     | autocorr_bern50-25   |
| autocorr_bern50-38      | autocorr_bern50-50     | autocorr_bern55-28   |
| autocorr_bern60-30      | camshape400            | camshape800          |
| chp_shorttermplan2c     | crudeoil_lee4_10       | crudeoil_li21        |
| crudeoil_pooling_dt1    | crudeoil_pooling_dt2   | crudeoil_pooling_dt3 |
| crudeoil_pooling_dt4    | edgexcross20-040       | edgexcross22-096     |
| edgexcross24-057        | edgexcross24-115       | ex8_2_3b             |
| ex8_2_5b                | faclay30               | faclay30h            |
| faclay33                | faclay35               | gasprod_sarawak81    |
| genpooling_meyer10      | genpooling_meyer15     | hvb11                |
| hydroenergy3            | ibs2                   | infeas1              |
| jbearing100             | jbearing50             | jbearing75           |
| lop97ic                 | lop97icx               | multiplants_stg6     |
| netmod_dol2             | nuclear104             | nuclear10a           |
| nuclear10b              | nuclear49a             | nuclear49b           |
| polygon100              | pooling_foulds3pq      | pooling_foulds3stp   |
| pooling_foulds3tp       | pooling_foulds4pq      | pooling_foulds4stp   |
| pooling_foulds4tp       | pooling_foulds5pq      | pooling_foulds5stp   |
| pooling_foulds5tp       | pooling_sppa0pq        | pooling_sppa0stp     |
| pooling_sppa0tp         | pooling_sppa5pq        | pooling_sppa5stp     |
| pooling_sppa5tp         | portfol_classical200_2 | portfol_robust200_03 |
| portfol_shortfall200_05 | qap                    | space960             |
| supplychainp1_053050    | supplychainr1_053050   | telecomsp_njlata     |
| telecomsp_pacbell       | torsion50              | turkey               |
| unitcommit2             |                        |                      |

**Table 14** List of instances where we don't terminate before the 5 minutes timeout.

|                  |                  |                  |                  |
|------------------|------------------|------------------|------------------|
| gams03           | pooling_sppa9pq  | pooling_sppa9stp | pooling_sppa9tp  |
| pooling_sppb0pq  | pooling_sppb0stp | pooling_sppb0tp  | pooling_sppb2pq  |
| pooling_sppb2stp | pooling_sppb2tp  | pooling_sppc0pq  | pooling_sppc0stp |
| pooling_sppc0tp  |                  |                  |                  |

Table 15: Detailed breakdown of instances where we don't identify convexity correctly. Instances marked with a dagger<sup>†</sup> fail because of numerical errors when computing eigenvalues.

| Instance         | Constraints Expected | Convexity Detected | Objective Expected | Convexity Detected | Objective Type Expected | Objective Type Detected |
|------------------|----------------------|--------------------|--------------------|--------------------|-------------------------|-------------------------|
| clay0203h        | convex               | indefinite         | linear             | linear             | linear                  | linear                  |
| clay0204h        | convex               | indefinite         | linear             | linear             | linear                  | linear                  |
| clay0205h        | convex               | indefinite         | linear             | linear             | linear                  | linear                  |
| clay0303h        | convex               | indefinite         | linear             | linear             | linear                  | linear                  |
| clay0304h        | convex               | indefinite         | linear             | linear             | linear                  | linear                  |
| clay0305h        | convex               | indefinite         | linear             | linear             | linear                  | linear                  |
| cvxnonsep_nsig20 | convex               | indefinite         | linear             | linear             | linear                  | linear                  |
| cvxnonsep_nsig30 | convex               | indefinite         | linear             | linear             | linear                  | linear                  |
| cvxnonsep_nsig40 | convex               | indefinite         | linear             | linear             | linear                  | linear                  |
| cvxnonsep_pcon20 | convex               | indefinite         | linear             | linear             | linear                  | linear                  |
| cvxnonsep_pcon30 | convex               | indefinite         | linear             | linear             | linear                  | linear                  |
| cvxnonsep_pcon40 | convex               | indefinite         | linear             | linear             | linear                  | linear                  |
| cvxnonsep_psig20 | linear               | linear             | convex             | indefinite         | nonlinear               | nonlinear               |
| cvxnonsep_psig30 | linear               | linear             | convex             | indefinite         | nonlinear               | nonlinear               |
| cvxnonsep_psig40 | linear               | linear             | convex             | indefinite         | nonlinear               | nonlinear               |

Continued on next page

Table 15 (continued)

| Instance                | Constraints Expected | Convexity Detected | Objective Expected | Convexity Detected | Objective Type Expected | Objective Type Detected |
|-------------------------|----------------------|--------------------|--------------------|--------------------|-------------------------|-------------------------|
| eq6_1 †                 | indefinite           | indefinite         | convex             | indefinite         | quadratic               | quadratic               |
| fac3 †                  | linear               | linear             | convex             | indefinite         | quadratic               | quadratic               |
| gams01                  | convex               | indefinite         | convex             | convex             | nonlinear               | nonlinear               |
| gasoil100 †             | indefinite           | indefinite         | convex             | indefinite         | quadratic               | quadratic               |
| gasoil200 †             | indefinite           | indefinite         | convex             | indefinite         | quadratic               | quadratic               |
| gasoil400 †             | indefinite           | indefinite         | convex             | indefinite         | quadratic               | quadratic               |
| gasoil50 †              | indefinite           | indefinite         | convex             | indefinite         | quadratic               | quadratic               |
| jbearing25 †            | linear               | linear             | convex             | indefinite         | quadratic               | quadratic               |
| johnall                 | indefinite           | indefinite         | indefinite         | indefinite         | nonlinear               | polynomial              |
| lip                     | linear               | linear             | convex             | concave            | nonlinear               | nonlinear               |
| methanol100 †           | indefinite           | indefinite         | convex             | indefinite         | quadratic               | quadratic               |
| methanol200 †           | indefinite           | indefinite         | convex             | indefinite         | quadratic               | quadratic               |
| methanol50 †            | indefinite           | indefinite         | convex             | indefinite         | quadratic               | quadratic               |
| pinene100 †             | indefinite           | indefinite         | convex             | indefinite         | quadratic               | quadratic               |
| pinene200 †             | indefinite           | indefinite         | convex             | indefinite         | quadratic               | quadratic               |
| pinene50 †              | indefinite           | indefinite         | convex             | indefinite         | quadratic               | quadratic               |
| pollut                  | linear               | linear             | convex             | indefinite         | nonlinear               | nonlinear               |
| popdynm100 †            | indefinite           | indefinite         | convex             | indefinite         | quadratic               | quadratic               |
| popdynm200 †            | indefinite           | indefinite         | convex             | indefinite         | quadratic               | quadratic               |
| popdynm25 †             | indefinite           | indefinite         | convex             | indefinite         | quadratic               | quadratic               |
| popdynm50 †             | indefinite           | indefinite         | convex             | indefinite         | quadratic               | quadratic               |
| portfoL_buysin          | convex               | indefinite         | linear             | linear             | linear                  | linear                  |
| portfoL_card            | convex               | indefinite         | linear             | linear             | linear                  | linear                  |
| portfoL_roundlot        | convex               | indefinite         | linear             | linear             | linear                  | linear                  |
| qp2 †                   | linear               | linear             | convex             | indefinite         | quadratic               | quadratic               |
| smallinvSNPr1b010-011 † | convex               | indefinite         | linear             | linear             | linear                  | linear                  |
| smallinvSNPr1b020-022 † | convex               | indefinite         | linear             | linear             | linear                  | linear                  |
| smallinvSNPr1b050-055 † | convex               | indefinite         | linear             | linear             | linear                  | linear                  |
| smallinvSNPr1b100-110 † | convex               | indefinite         | linear             | linear             | linear                  | linear                  |
| smallinvSNPr1b150-165 † | convex               | indefinite         | linear             | linear             | linear                  | linear                  |
| smallinvSNPr1b200-220 † | convex               | indefinite         | linear             | linear             | linear                  | linear                  |
| smallinvSNPr2b010-011 † | convex               | indefinite         | linear             | linear             | linear                  | linear                  |
| smallinvSNPr2b020-022 † | convex               | indefinite         | linear             | linear             | linear                  | linear                  |
| smallinvSNPr2b050-055 † | convex               | indefinite         | linear             | linear             | linear                  | linear                  |
| smallinvSNPr2b100-110 † | convex               | indefinite         | linear             | linear             | linear                  | linear                  |
| smallinvSNPr2b150-165 † | convex               | indefinite         | linear             | linear             | linear                  | linear                  |
| smallinvSNPr2b200-220 † | convex               | indefinite         | linear             | linear             | linear                  | linear                  |
| smallinvSNPr3b010-011 † | convex               | indefinite         | linear             | linear             | linear                  | linear                  |
| smallinvSNPr3b020-022 † | convex               | indefinite         | linear             | linear             | linear                  | linear                  |
| smallinvSNPr3b050-055 † | convex               | indefinite         | linear             | linear             | linear                  | linear                  |
| smallinvSNPr3b100-110 † | convex               | indefinite         | linear             | linear             | linear                  | linear                  |
| smallinvSNPr3b150-165 † | convex               | indefinite         | linear             | linear             | linear                  | linear                  |
| smallinvSNPr3b200-220 † | convex               | indefinite         | linear             | linear             | linear                  | linear                  |
| smallinvSNPr4b010-011 † | convex               | indefinite         | linear             | linear             | linear                  | linear                  |
| smallinvSNPr4b020-022 † | convex               | indefinite         | linear             | linear             | linear                  | linear                  |
| smallinvSNPr4b050-055 † | convex               | indefinite         | linear             | linear             | linear                  | linear                  |
| smallinvSNPr4b100-110 † | convex               | indefinite         | linear             | linear             | linear                  | linear                  |
| smallinvSNPr4b150-165 † | convex               | indefinite         | linear             | linear             | linear                  | linear                  |
| smallinvSNPr4b200-220 † | convex               | indefinite         | linear             | linear             | linear                  | linear                  |
| smallinvSNPr5b010-011 † | convex               | indefinite         | linear             | linear             | linear                  | linear                  |
| smallinvSNPr5b020-022 † | convex               | indefinite         | linear             | linear             | linear                  | linear                  |
| smallinvSNPr5b050-055 † | convex               | indefinite         | linear             | linear             | linear                  | linear                  |
| smallinvSNPr5b100-110 † | convex               | indefinite         | linear             | linear             | linear                  | linear                  |
| smallinvSNPr5b150-165 † | convex               | indefinite         | linear             | linear             | linear                  | linear                  |
| smallinvSNPr5b200-220 † | convex               | indefinite         | linear             | linear             | linear                  | linear                  |
| st_e17                  | convex               | indefinite         | linear             | linear             | linear                  | linear                  |
| st_qpc-m3a †            | linear               | linear             | concave            | indefinite         | quadratic               | quadratic               |
| st_qpc-m3b †            | linear               | linear             | concave            | indefinite         | quadratic               | quadratic               |
| st_qpc-m3c †            | linear               | linear             | concave            | indefinite         | quadratic               | quadratic               |
| tls12                   | convex               | indefinite         | linear             | linear             | linear                  | linear                  |
| tls2                    | convex               | indefinite         | linear             | linear             | linear                  | linear                  |

Continued on next page

Table 15 (continued)

| Instance                             | Constraints |            | Objective Convexity |            | Objective Type |           |
|--------------------------------------|-------------|------------|---------------------|------------|----------------|-----------|
|                                      | Expected    | Detected   | Expected            | Detected   | Expected       | Detected  |
| tls4                                 | convex      | indefinite | linear              | linear     | linear         | linear    |
| tls5                                 | convex      | indefinite | linear              | linear     | linear         | linear    |
| tls6                                 | convex      | indefinite | linear              | linear     | linear         | linear    |
| tls7                                 | convex      | indefinite | linear              | linear     | linear         | linear    |
| watercontamination0202r <sup>†</sup> | linear      | linear     | convex              | indefinite | quadratic      | quadratic |
| watercontamination0303r <sup>†</sup> | linear      | linear     | convex              | indefinite | quadratic      | quadratic |
